# Supplementary material for: Disruption of cellular immune response among male rotating night shift workers in Spain– The HORMONIT study
Source: PubMed Central journal article supplement (PMC9478612; doi:10.3389/fimmu.2022.776917), 2022-09-02

Supplemental Figure 1: Cytokine, chemokine and growth factor concentrations ( $\log_{10}$  pg/mL) measured in the same individual and at the same time (06:00 h) at the start of a day shift and at the end of a night shift. Boxes depict median  $\log_{10}$  pg/mL and interquartile ranges (IQR), A paired Wilcoxon rank test was used to assess statistically significant differences in analytes concentrations between shift work. Trajectory points link analytes' concentrations from same individual.

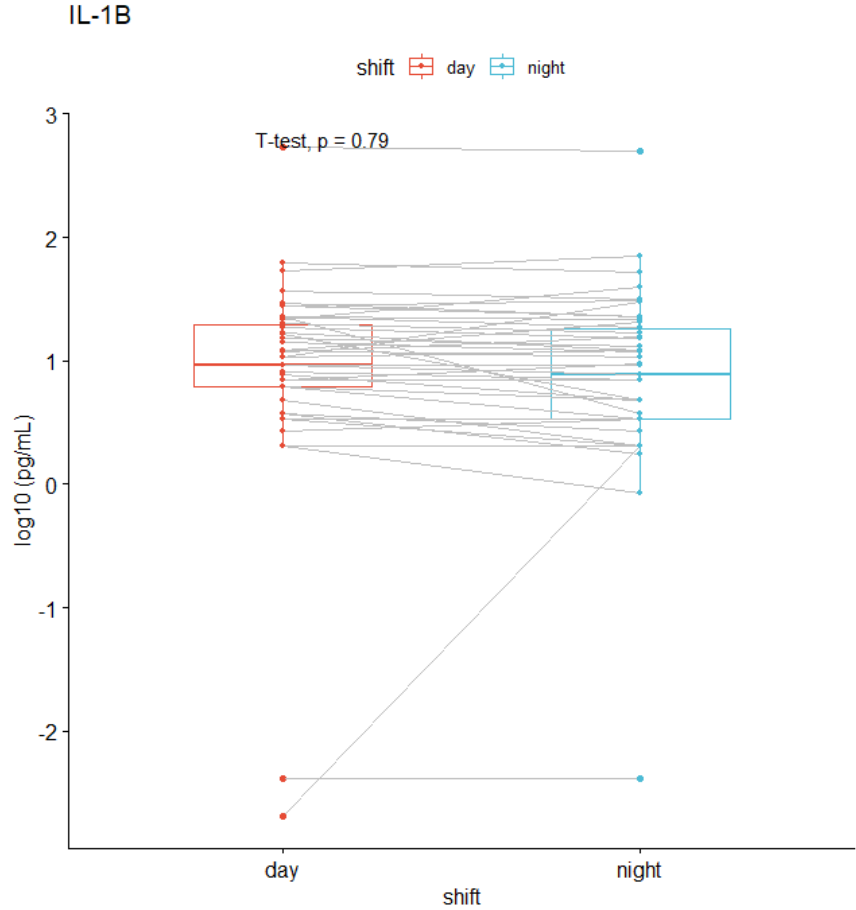

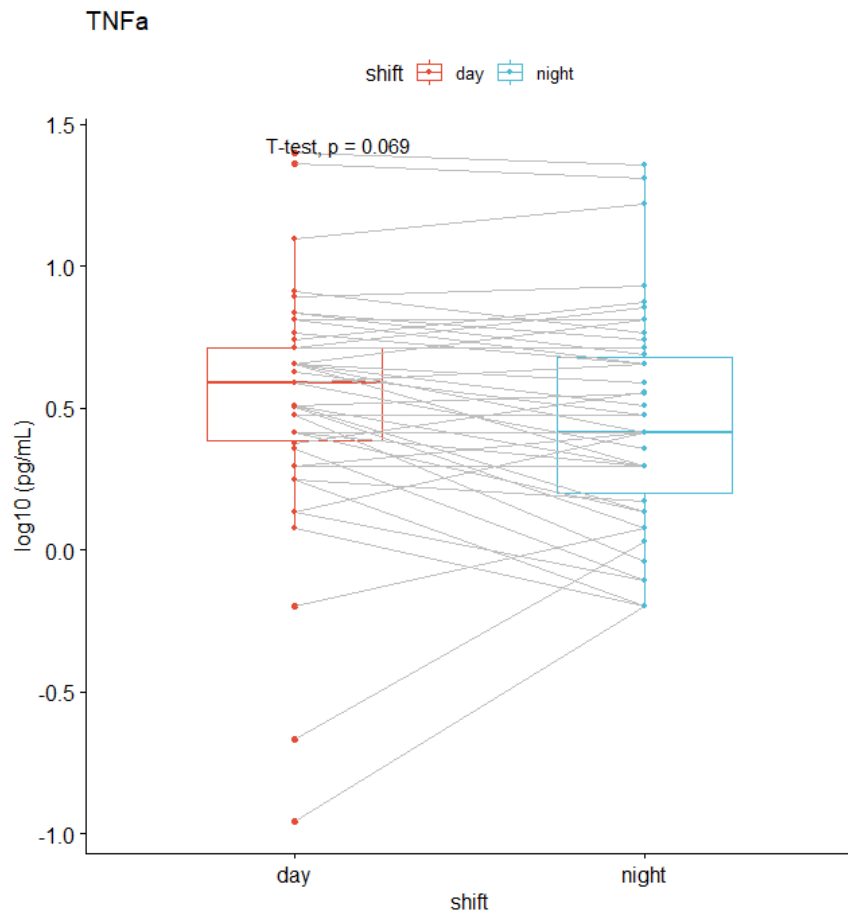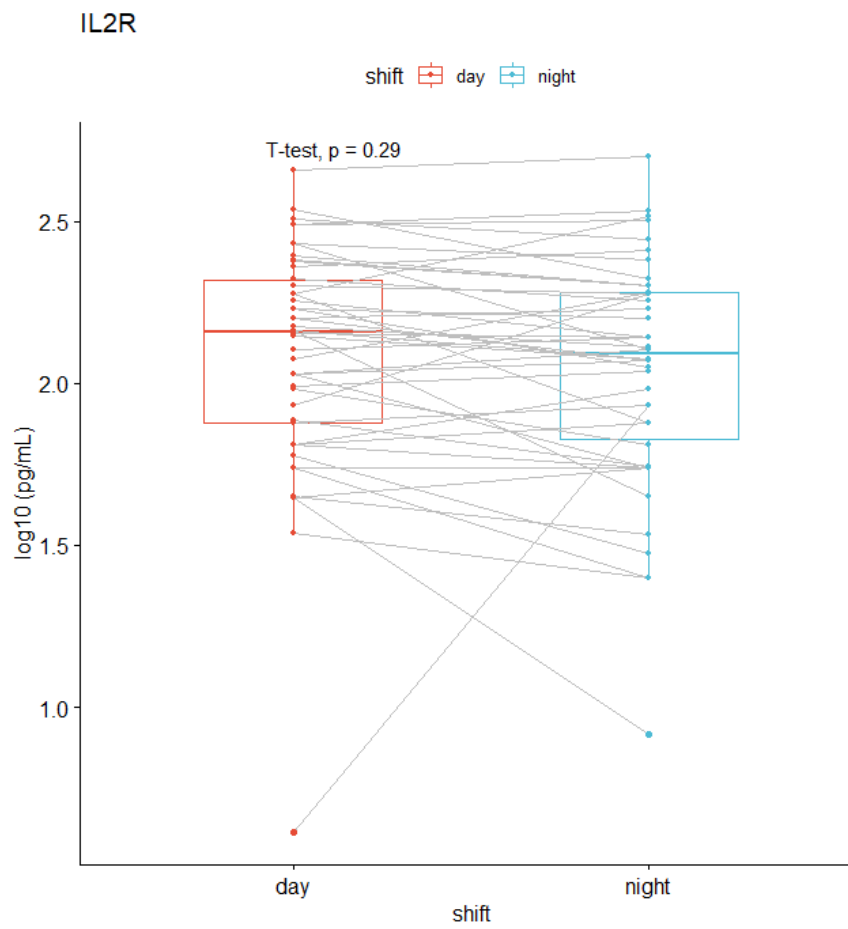

### IFNa

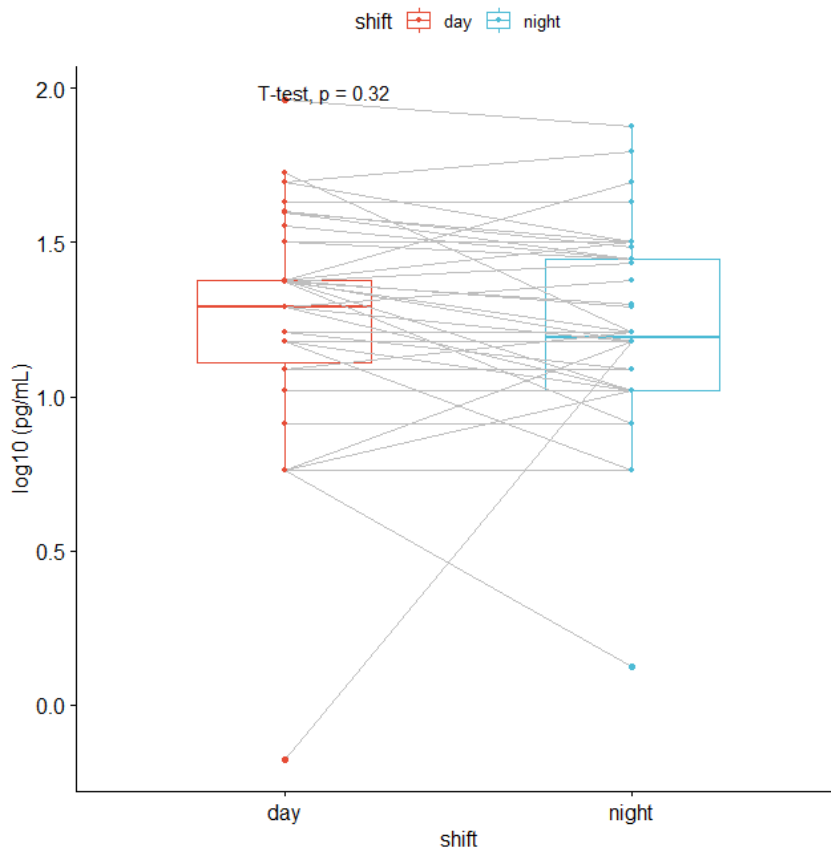

### IL10

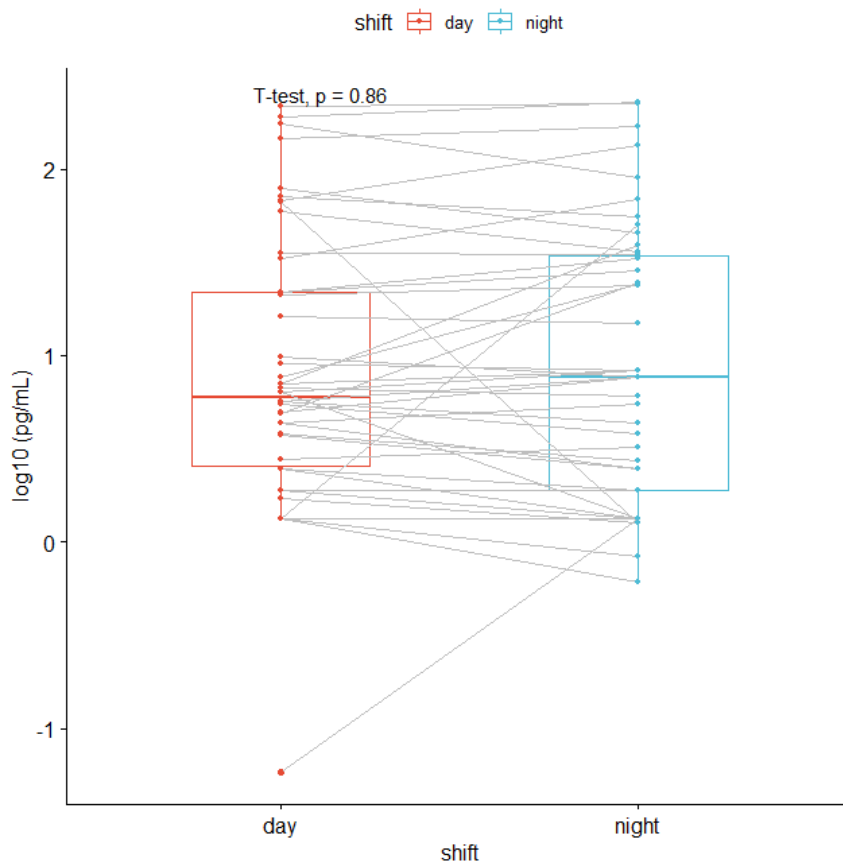

### IL1RA

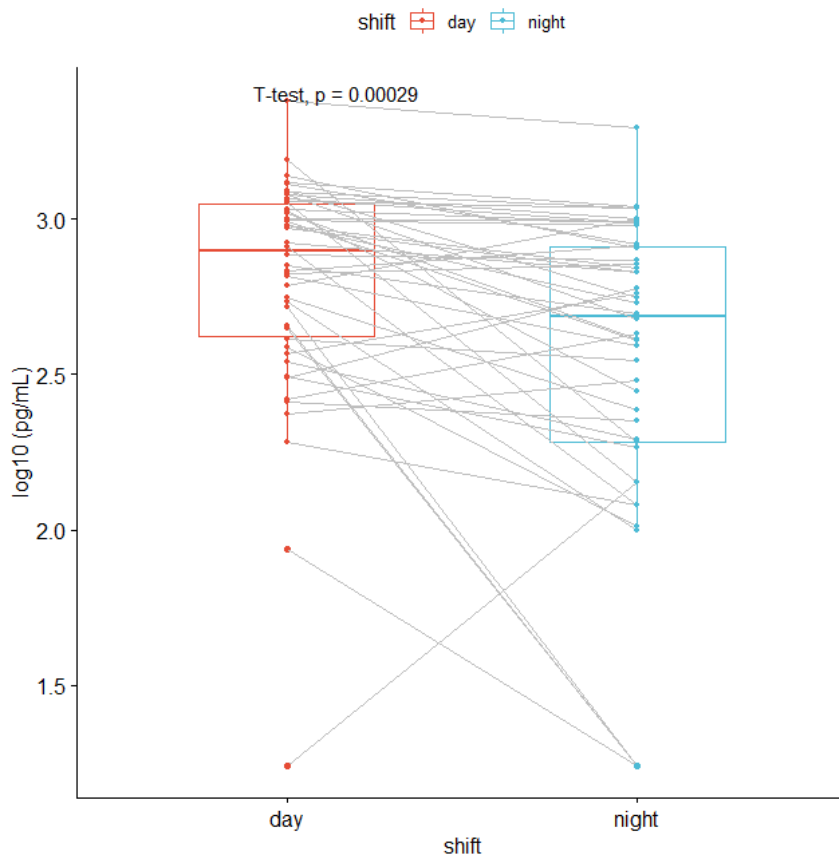

### IFNg

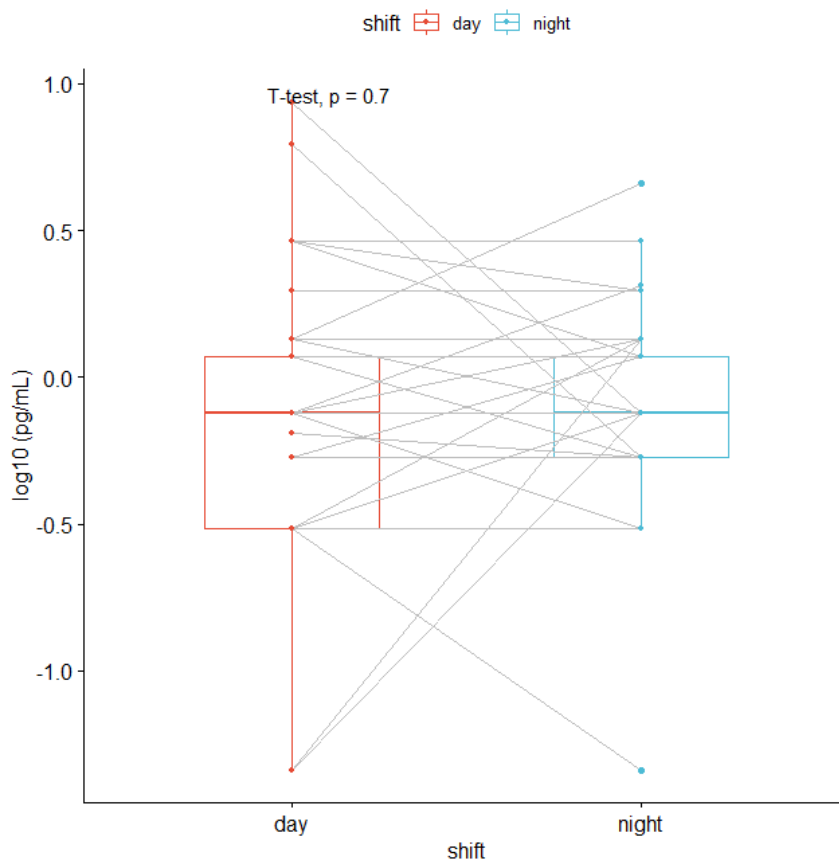

IL12

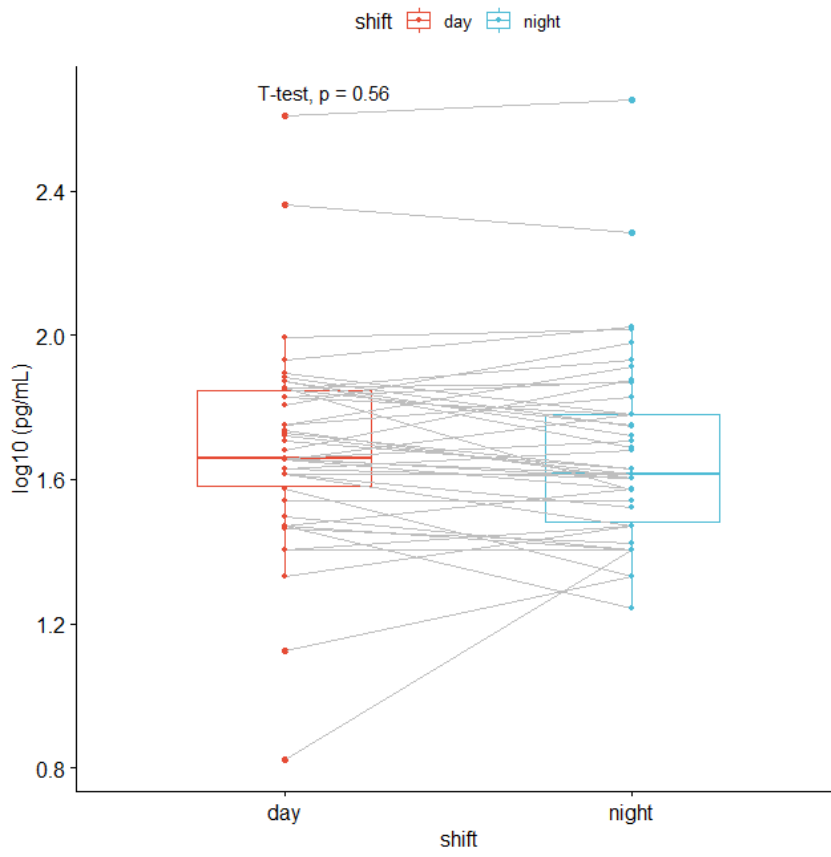

IL2

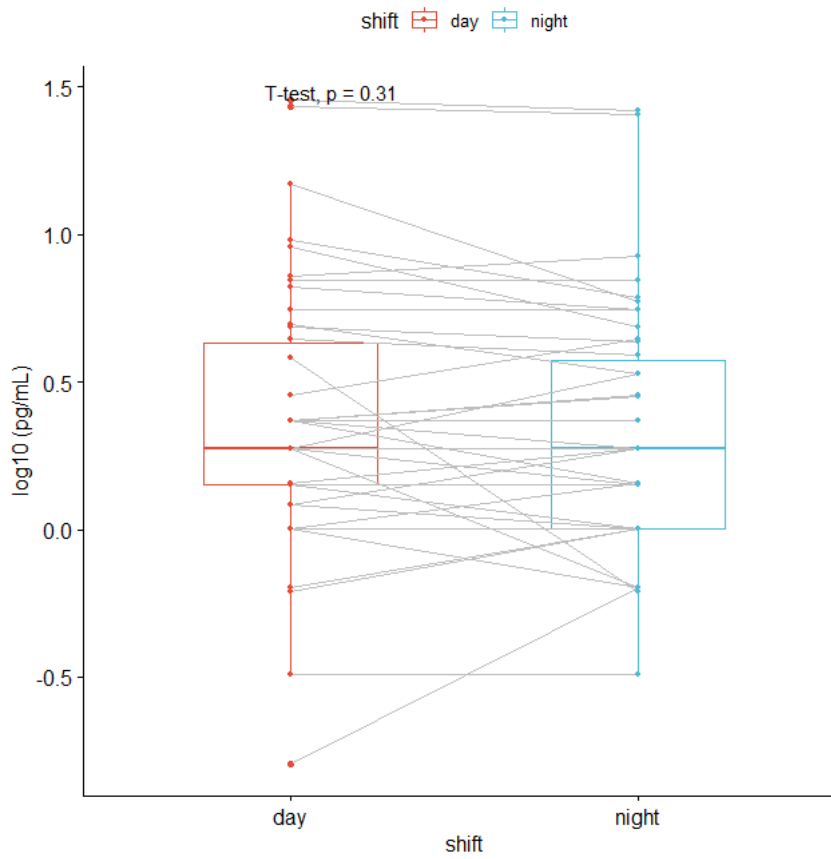

### IL15

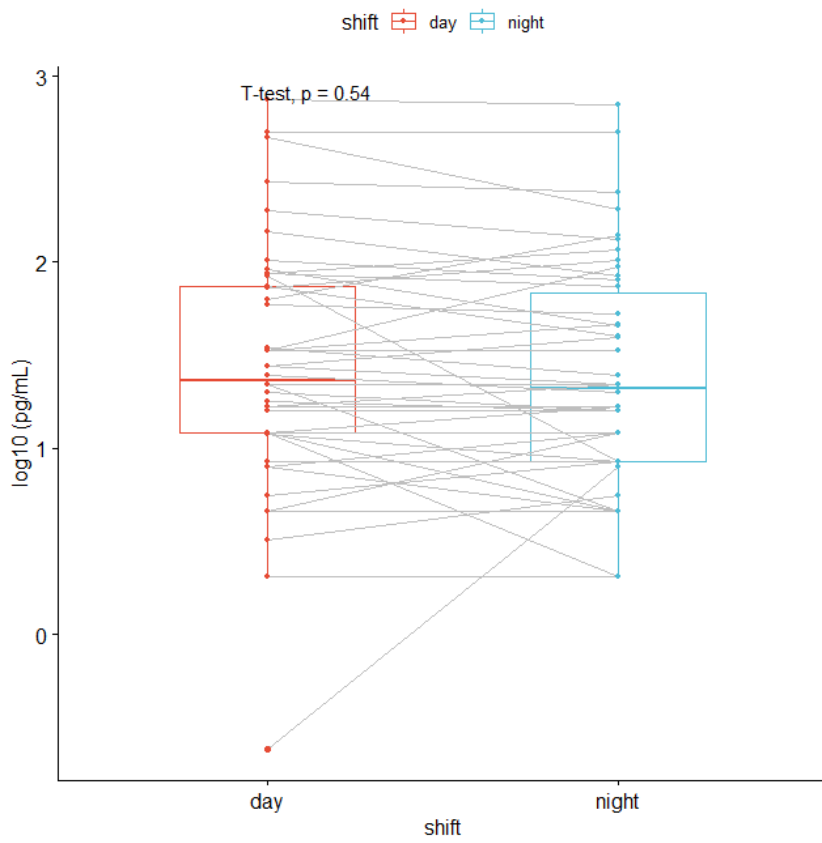

### IL4

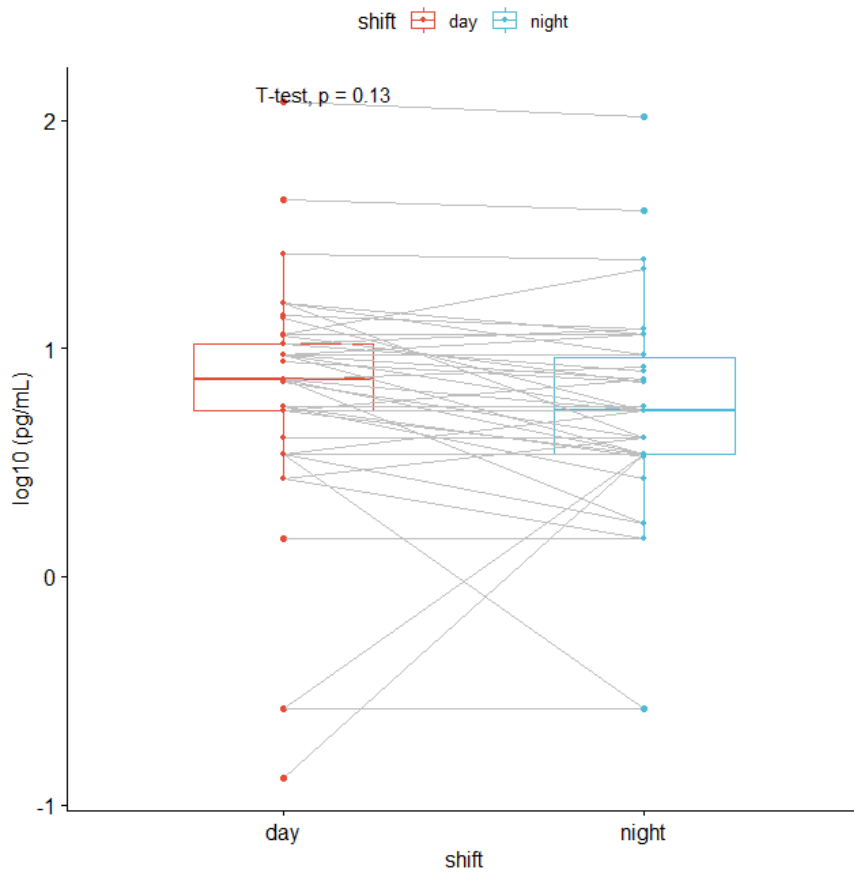

IL5

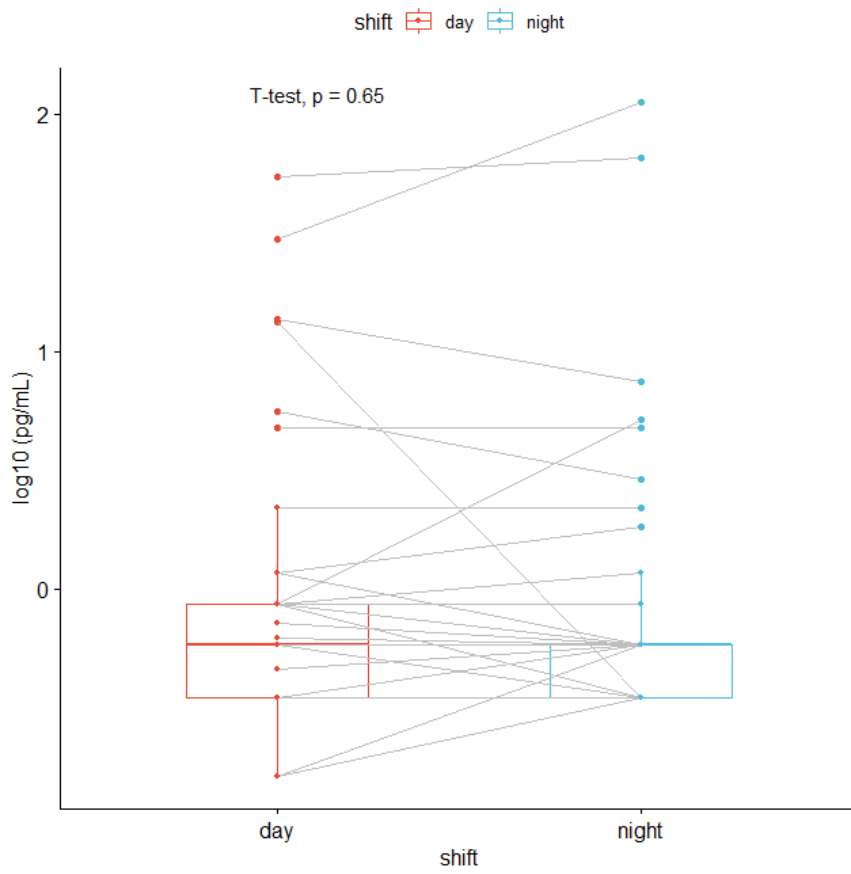

IL6

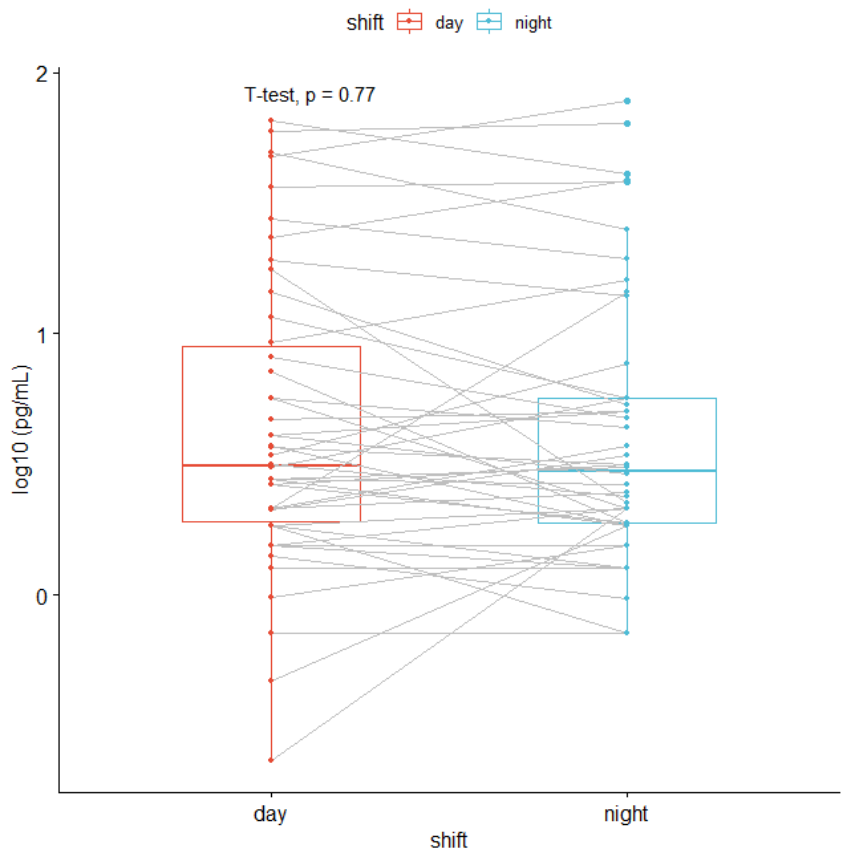

### IL17

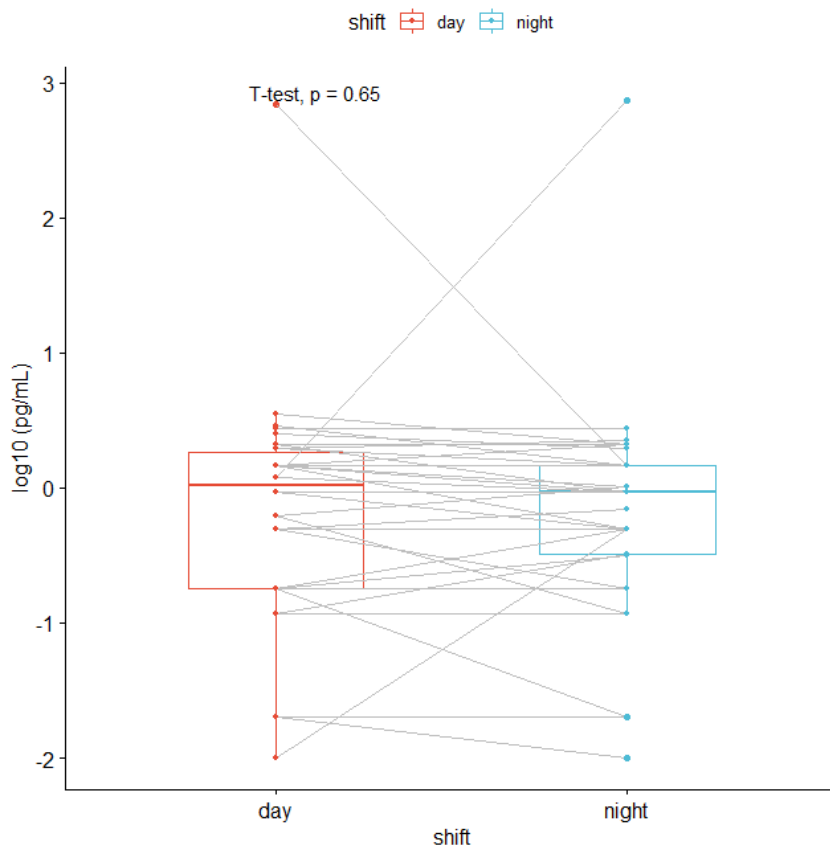

### IP10

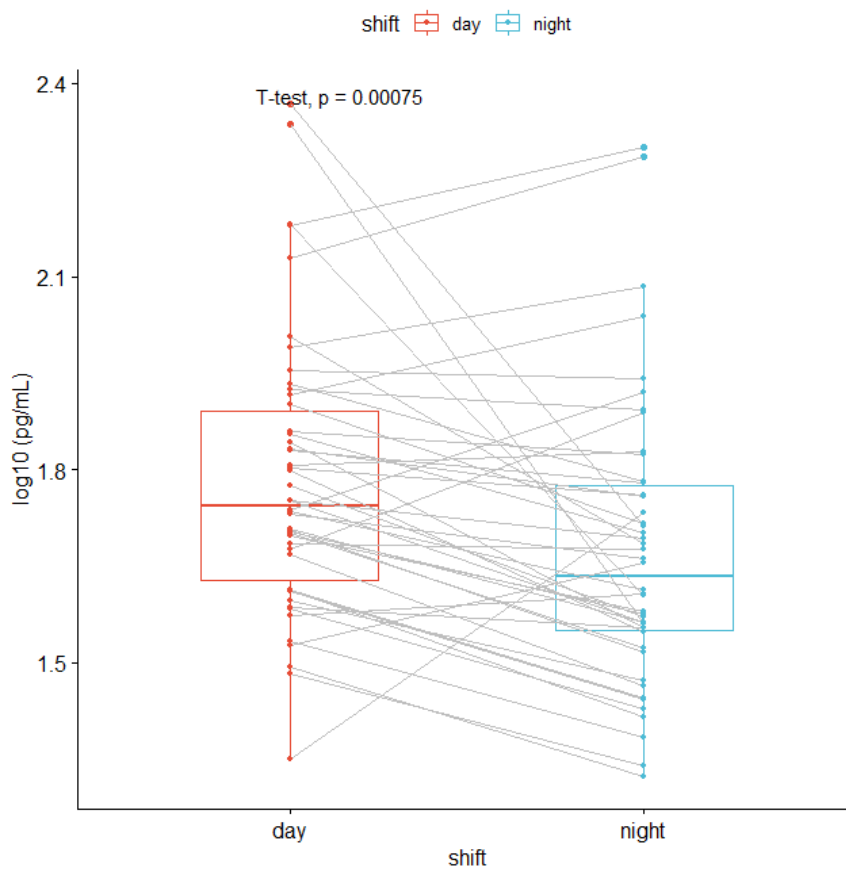



### MCP1

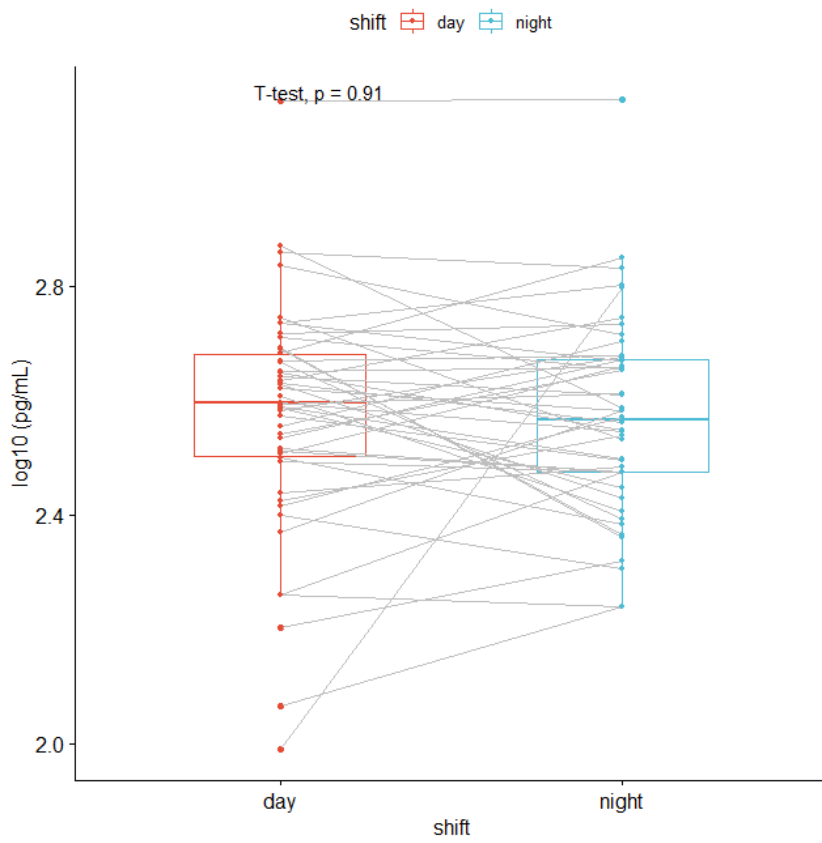

### MIP1A

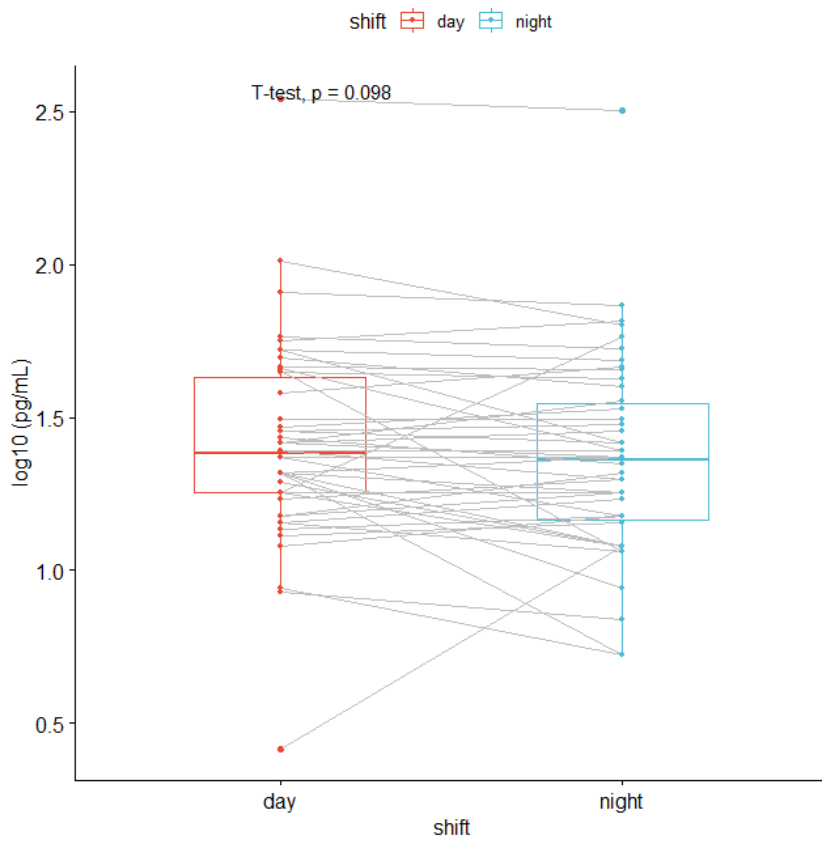

### MIP1B

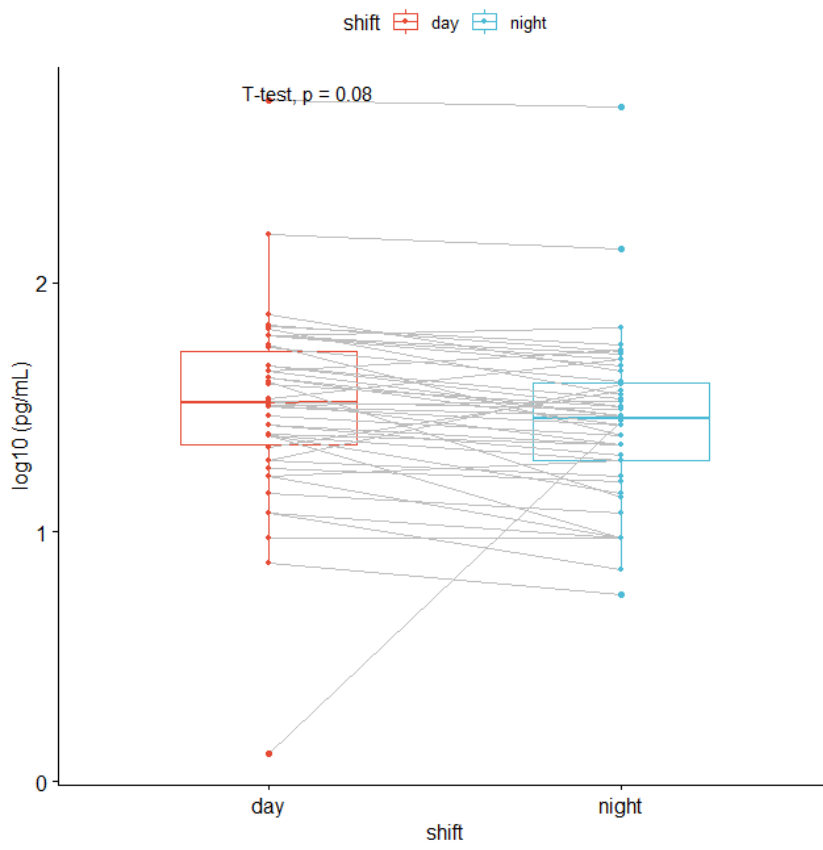

### EOTAXIN

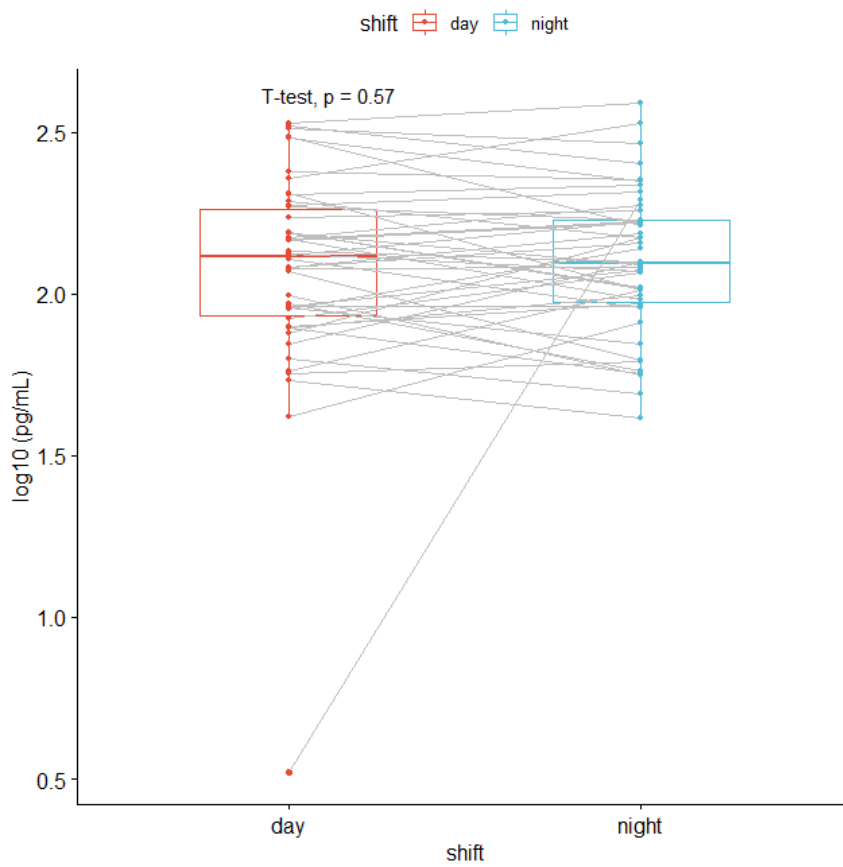

### RANTES

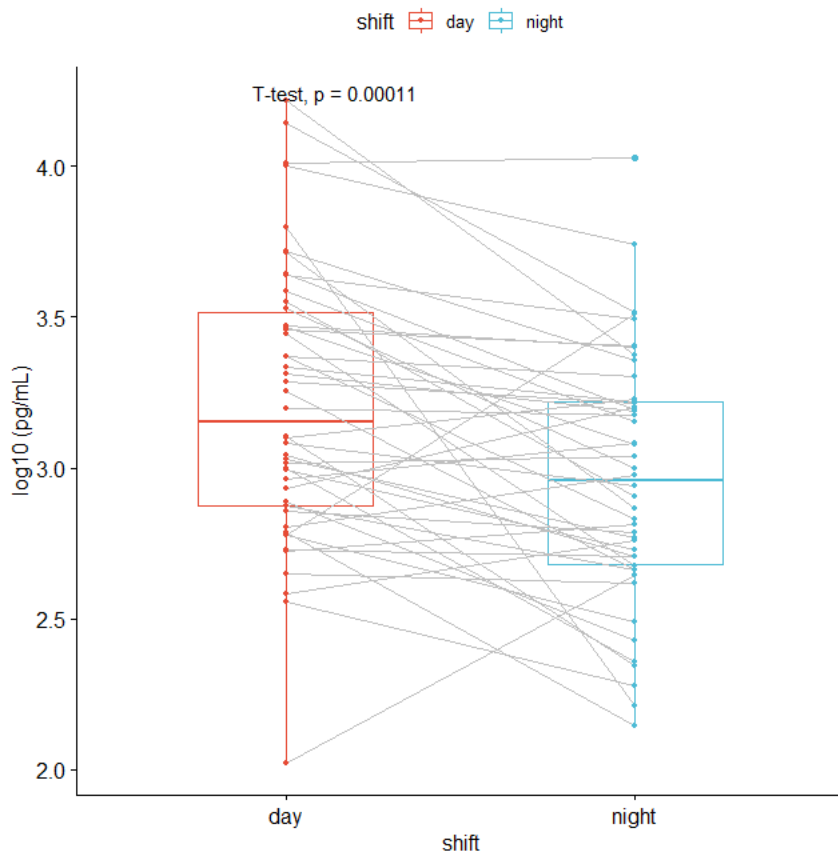

### MIG

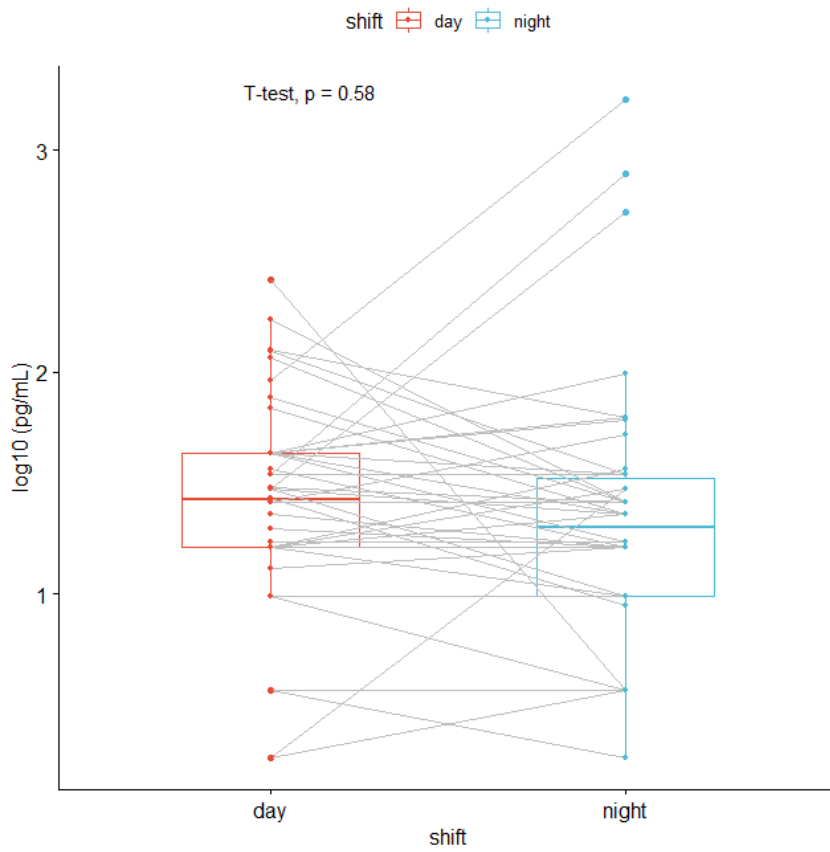

### EGF

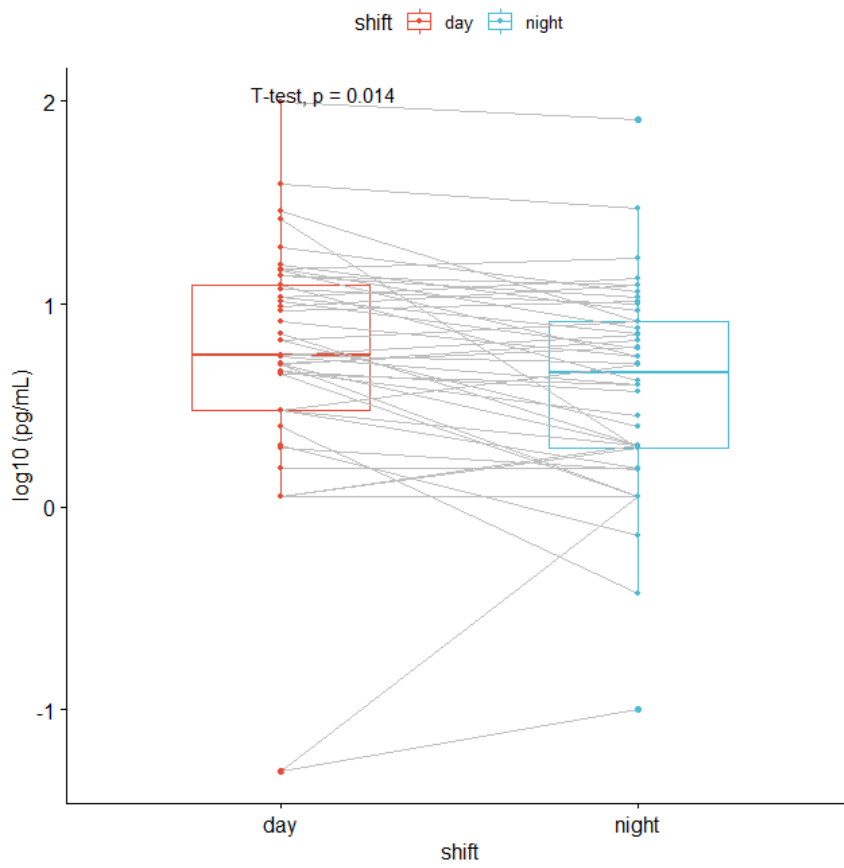

### GCSF

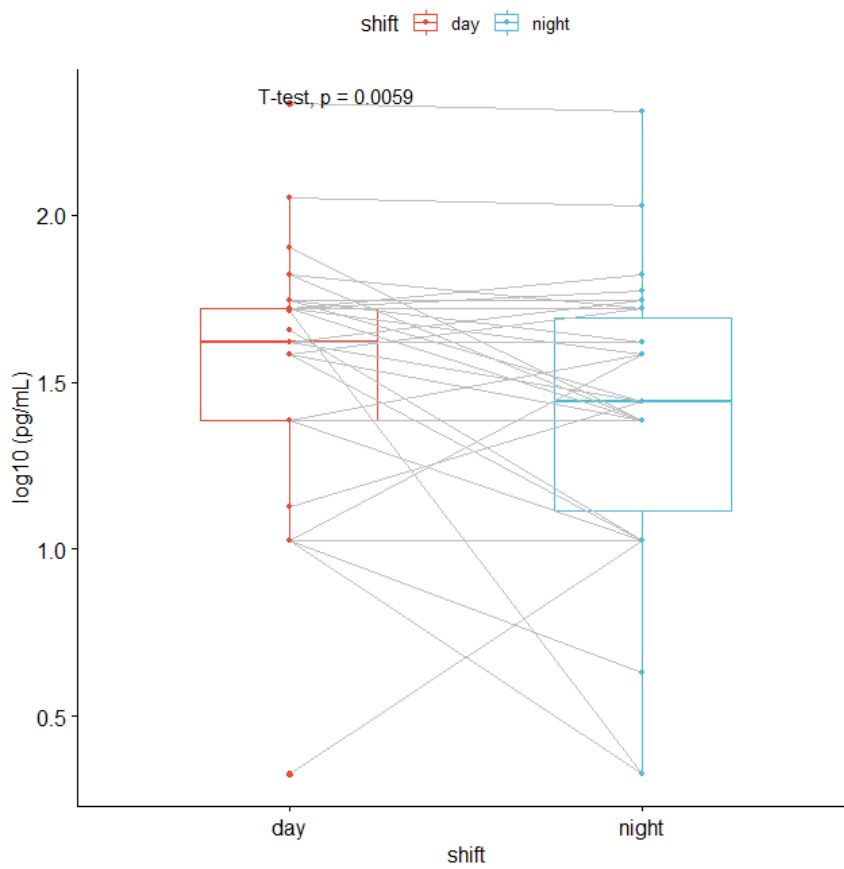

### GMCSF

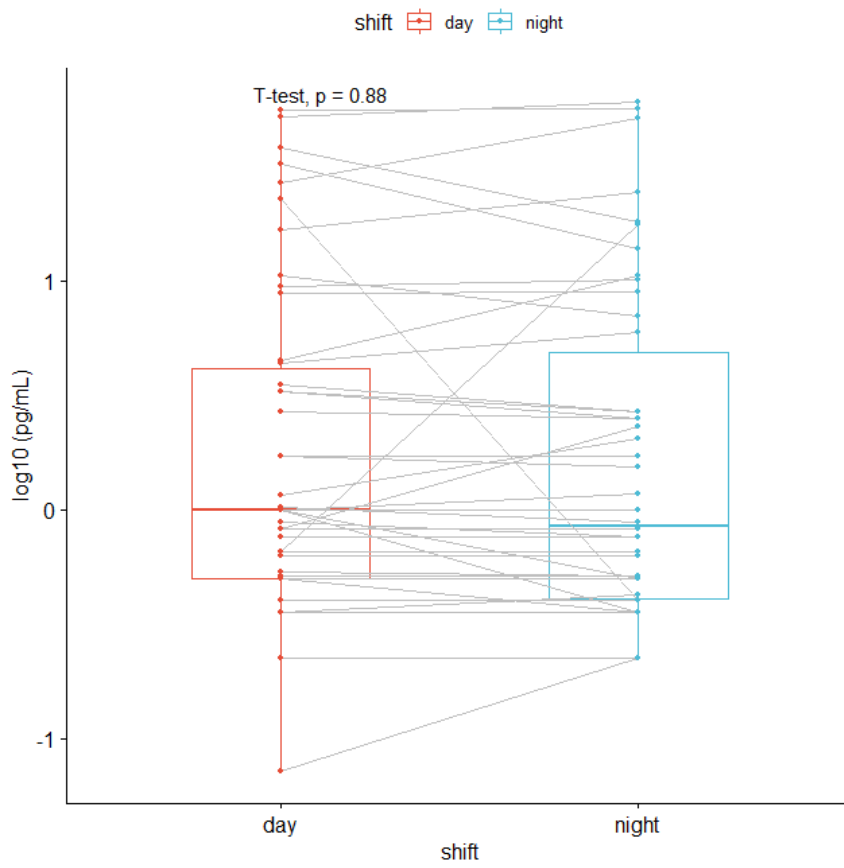

### HGF

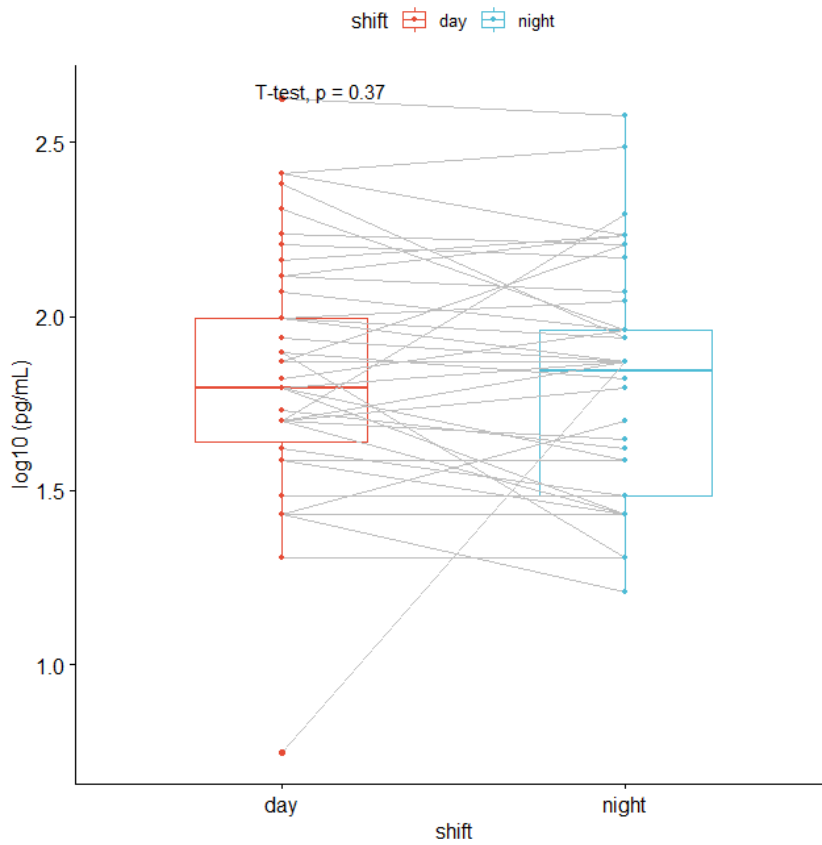

### VEGF

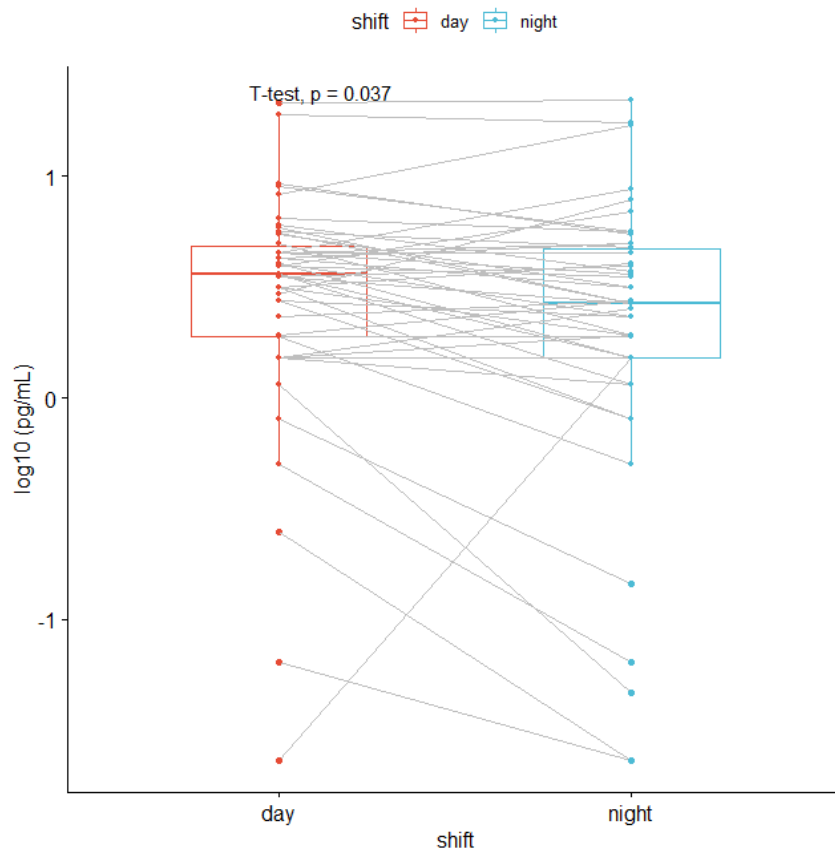

### FGF

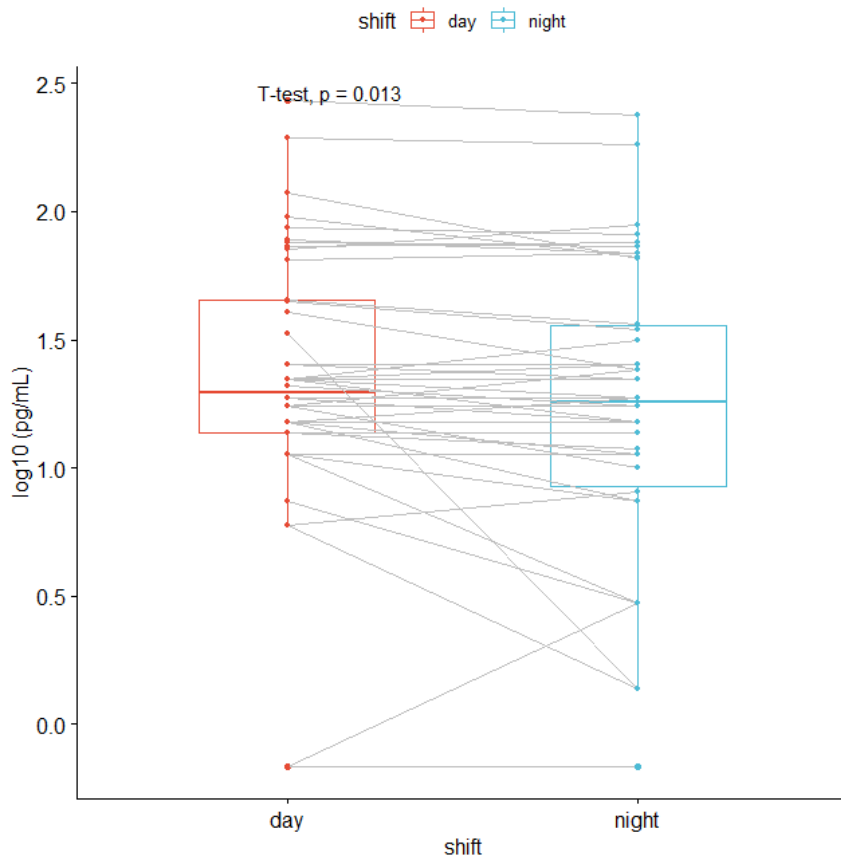

Supplement: DataSheet_1.pdf [file DataSheet_1.pdf]
